# Supplementary material
Source: PubMed Central journal article supplement (PMC2329694)

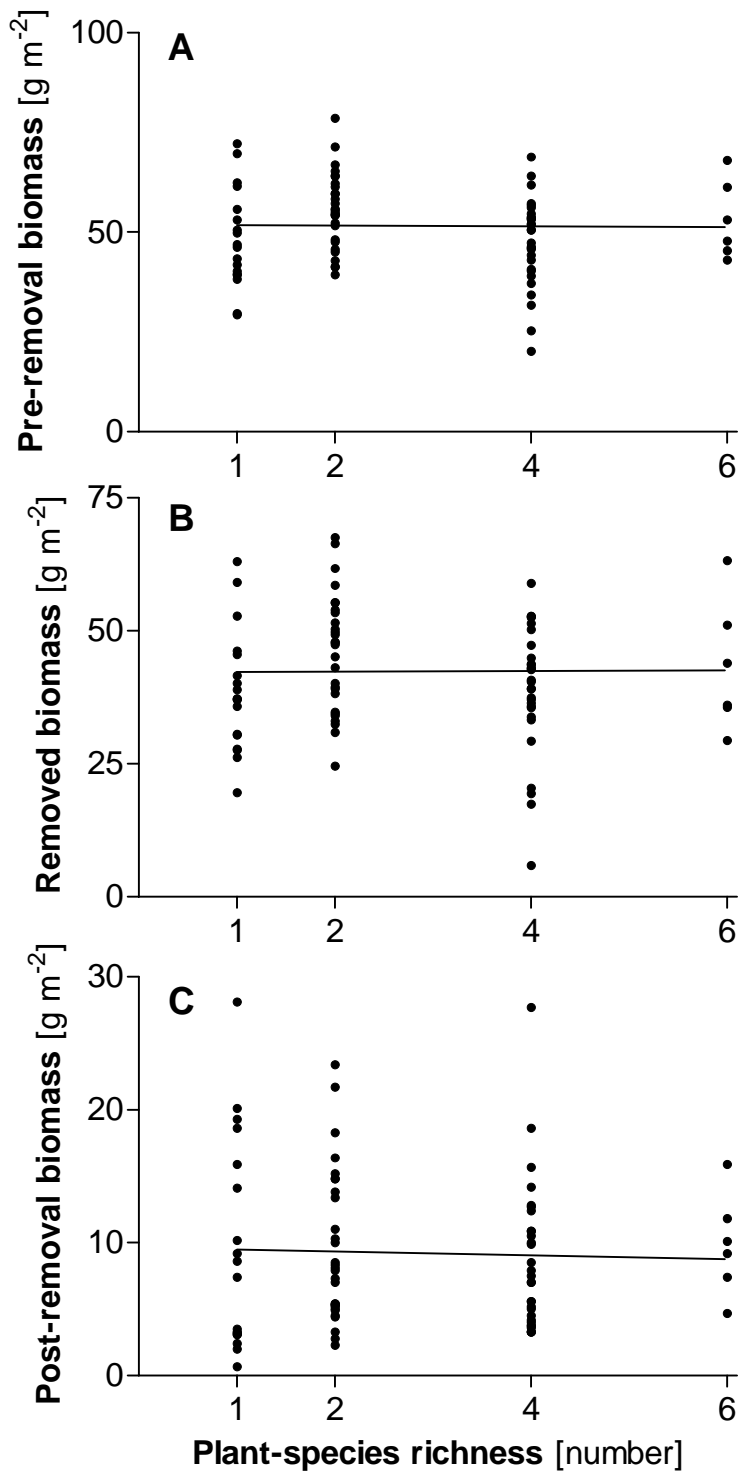

Supplement: pnas_0704801105_1.pdf [file pnas_0704801105_1.pdf]

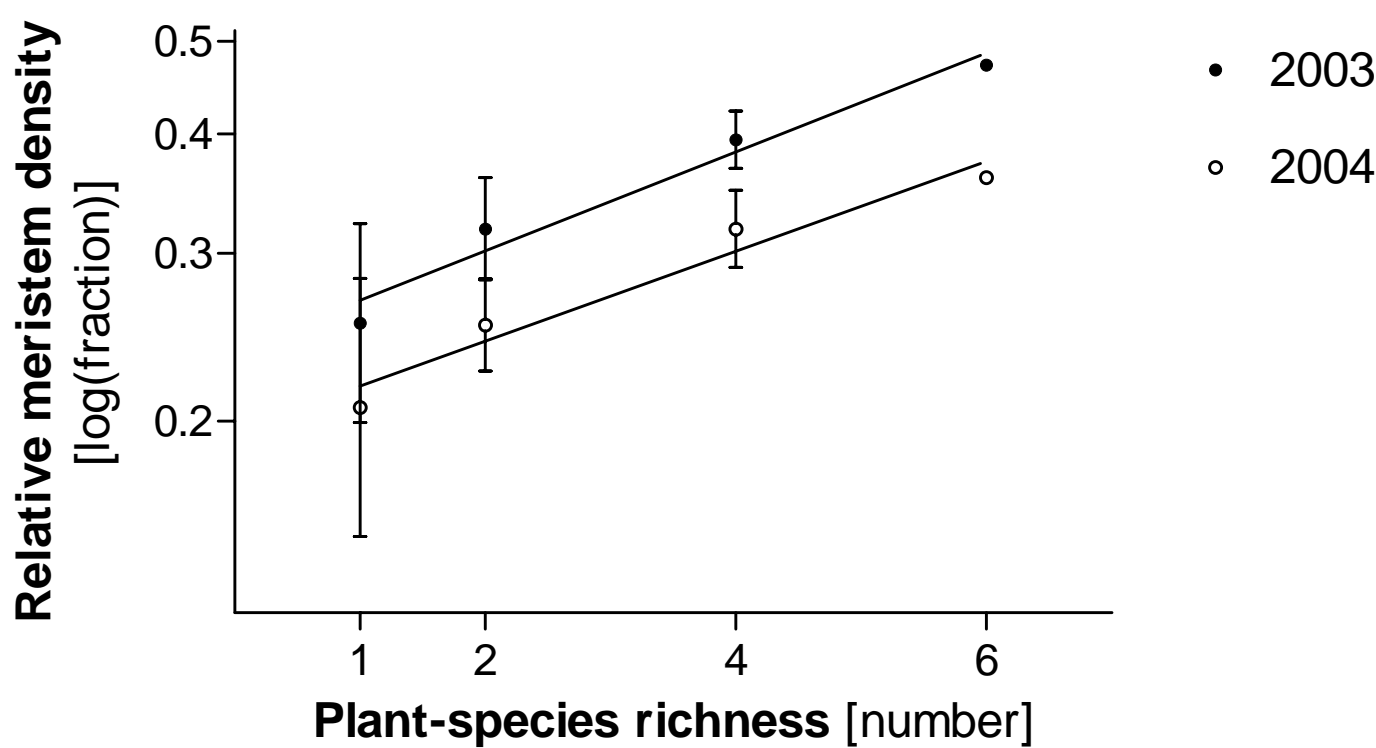

Supplement: pnas_0704801105_2.pdf [file pnas_0704801105_2.pdf]

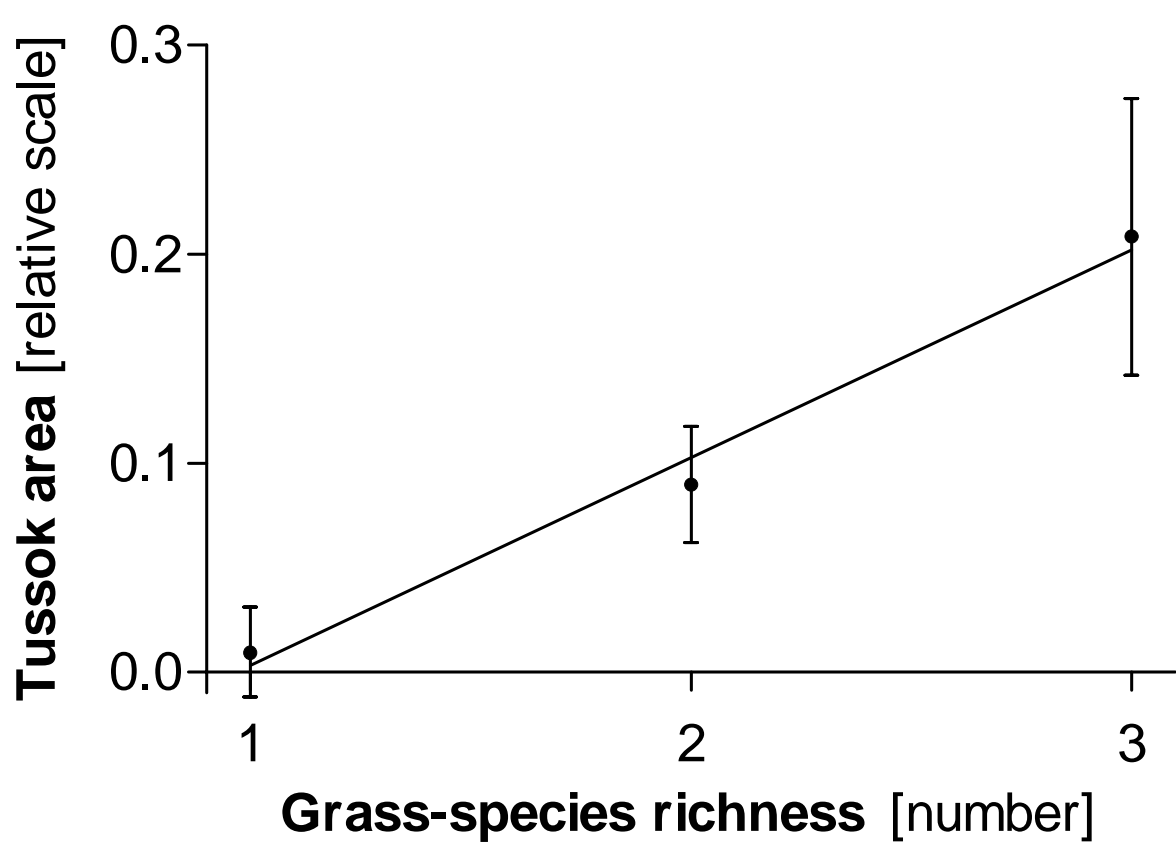

Supplement: pnas_0704801105_3.pdf [file pnas_0704801105_3.pdf]

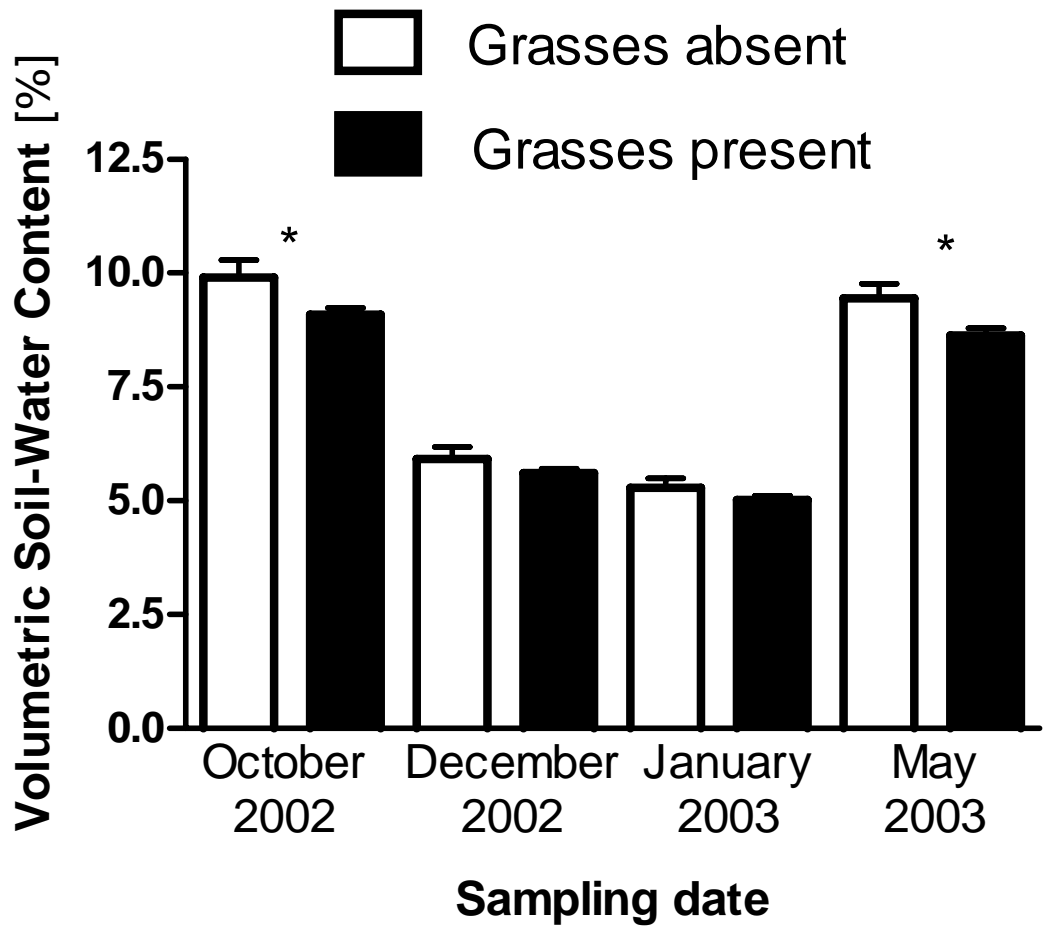

Supplement: pnas_0704801105_4.pdf [file pnas_0704801105_4.pdf]

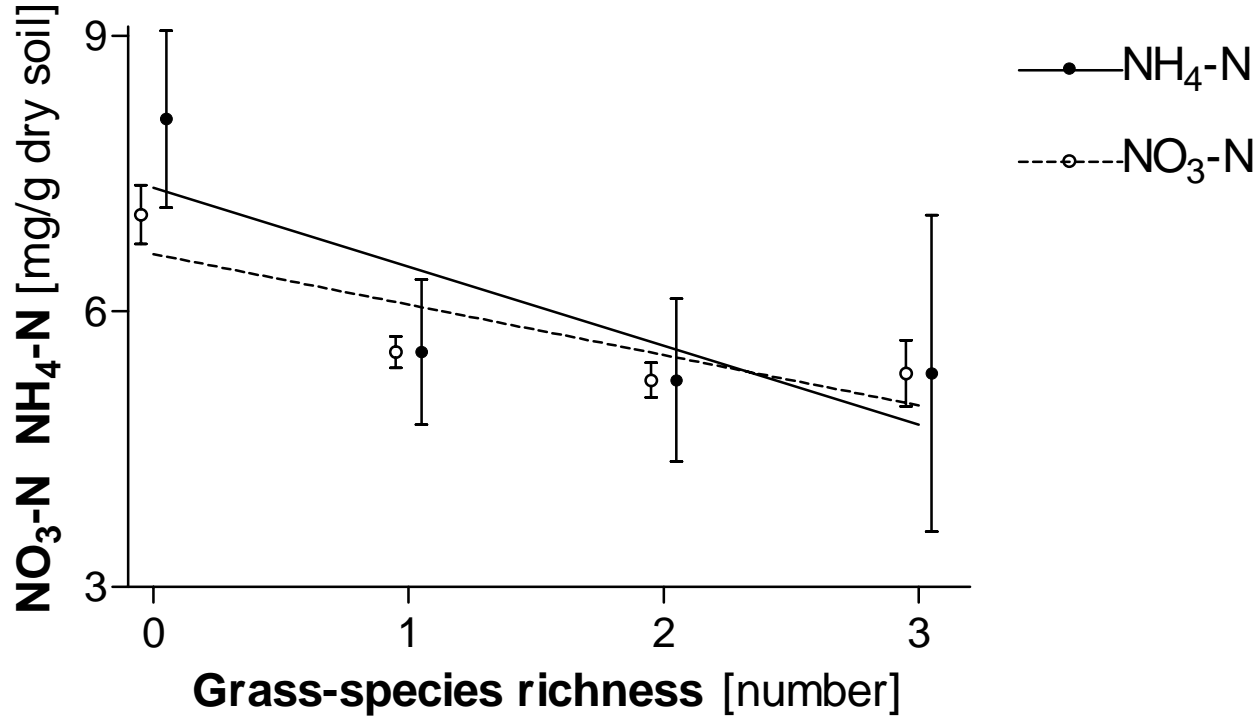

Supplement: pnas_0704801105_5.pdf [file pnas_0704801105_5.pdf]

I

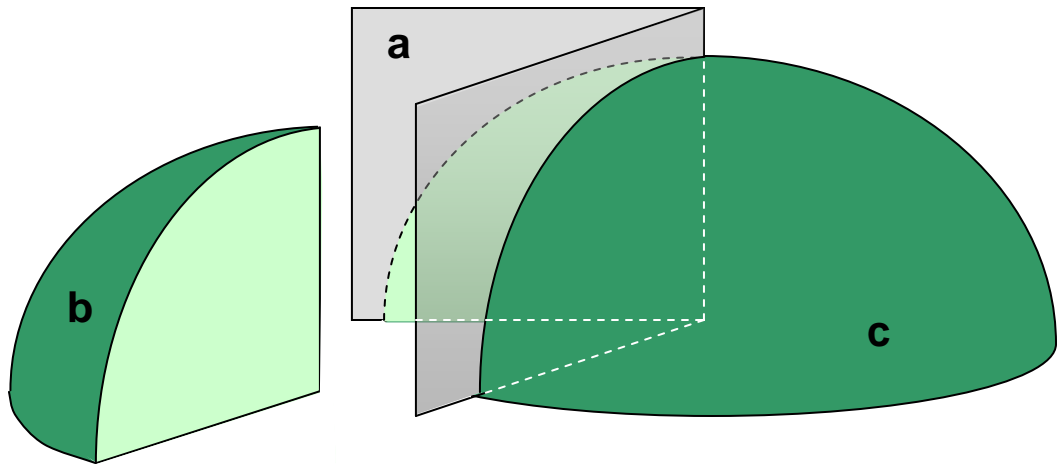

II

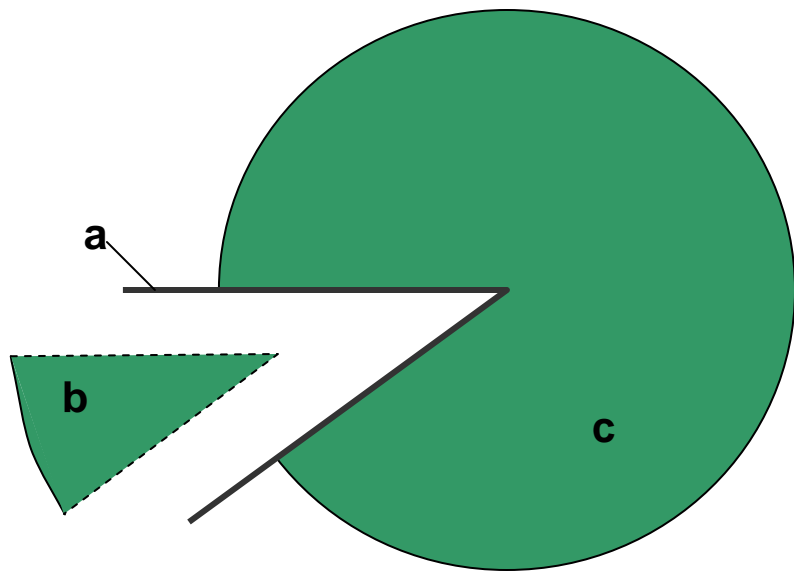

Supplement: pnas_0704801105_6.pdf [file pnas_0704801105_6.pdf]
